# Supplementary material for: Geographic Distribution of Epizootic haematopoietic necrosis virus (EHNV) in Freshwater Fish in South Eastern Australia: Lost Opportunity for a Notifiable Pathogen to Expand Its Geographic Range
Source: MDPI journal article supplement (doi:10.3390/v11040315), 2019-04-01
Supplement: s1 [file s1]

**Supplementary Table S1.** Summary of tissue samples collected from redfin perch and other species between 2007 and 2011, based on year and catchment area.

| Species      | Collection Year | Compartment    | Zone <sup>1</sup> | Site Locations                                                              | Number of Fish |             |
|--------------|-----------------|----------------|-------------------|-----------------------------------------------------------------------------|----------------|-------------|
|              |                 |                |                   |                                                                             | Tested         | VI Positive |
| Redfin perch | 2007            | Murrumbidgee   | Upper             | Burrinjuck Dam                                                              | 136            |             |
| Redfin perch | 2008            | Goulburn       | Lower             | Tahbilk Lagoon                                                              | 26             |             |
| Redfin perch | 2008            | Lachlan        | Upper             | Reidsdale, Little Narraway                                                  | 5              |             |
| Redfin perch | 2008            | Lachlan        | Upper             | Boorowa River Site 860                                                      | 25             |             |
| Redfin perch | 2008            | Ovens (Murray) | Lower             | Lake Buffalo, VIC                                                           | 214            |             |
| Redfin perch | 2008            | Murray         | Lower             | Mulwala Canal                                                               | 113            |             |
| Redfin perch | 2008            | Murrumbidgee   | Upper             | Cotter River and Murrumbidgee River ACT                                     | 23             |             |
| Redfin perch | 2008            | Murrumbidgee   | Upper             | Burrinjuck Dam                                                              | 97             |             |
| Redfin perch | 2008            | Murrumbidgee   | Upper             | Lake Ginnindera, ACT                                                        | 51             | 1           |
| Redfin perch | 2008            | Murrumbidgee   | Lower             | Columbo Creek                                                               | 6              |             |
| Redfin perch | 2008            | Unknown        |                   |                                                                             | 11             |             |
| Redfin perch | 2009            | Broken         |                   |                                                                             | 74             |             |
| Redfin perch | 2009            | Gwydir         | Upper             | Copeton Dam                                                                 | 10             |             |
| Redfin perch | 2009            | Goulburn       |                   | Seven's Creek                                                               | 112            |             |
| Redfin perch | 2009            | Lachlan        | Upper             | Boorowa River, Belubula River, Reidsdale, Narrawa Bridge, Abercrombie River | 28             |             |
| Redfin perch | 2009            | Macquarie      | Upper             | Fish River, Campbells River                                                 | 12             |             |
| Redfin perch | 2009            | Murray         | Lower             | Neds Anabranh, Yarrawonga to Tocumwal, Lake Victoria, Mulwala Canal         | 84             |             |
| Redfin perch | 2009            | Murrumbidgee   | Upper             | Cotter Dam                                                                  | 2              |             |

| Species         | Collection Year | Compartment         | Zone <sup>1</sup> | Site Locations            | Number of Fish |             |
|-----------------|-----------------|---------------------|-------------------|---------------------------|----------------|-------------|
|                 |                 |                     |                   |                           | Tested         | VI Positive |
| Redfin perch    | 2009            | Murrumbidgee        | Upper             | Cotter River              | 1              |             |
| Redfin perch    | 2009            | Murrumbidgee        | Upper             | Molonglo River            | 7              |             |
| Redfin perch    | 2009            | Murrumbidgee        | Upper             | Yerrabi Pond              | 2              |             |
| Redfin perch    | 2009            | Murrumbidgee        | Upper             | Point Hut Crossing        | 1              |             |
| Redfin perch    | 2009            | Murrumbidgee        | Upper             | Googong Reservoir         | 43             |             |
| Redfin perch    | 2009            | Murrumbidgee        | Upper             | Lake Ginninderra          | 40             |             |
| Redfin perch    | 2009            | Murrumbidgee        | Upper             | Blowering Dam             | 109            | 8           |
| Redfin perch    | 2009            | Murrumbidgee        | Upper             | Burrinjuck Dam            | 35             |             |
| Redfin perch    | 2009            | Murrumbidgee        | Lower             | Bethungra Dam             | 6              |             |
| Redfin perch    | 2009            | Murrumbidgee        | Lower             | Columbo Creek, Hay, Maude | 9              |             |
| Redfin perch    | 2009            | Snowy               | Upper             | Bombala                   | 2              |             |
| Redfin perch    | 2009            | Yarra <sup>2</sup>  |                   | Wonga Park, Jumping Creek | 12             |             |
| Redfin perch    | 2010            | Gwydir              | Upper             | Copeton Dam               | 153            |             |
| Redfin perch    | 2010            | Macquarie           | Lower             | Dubbo                     | 115            |             |
| Redfin perch    | 2010            | Murrumbidgee        | Upper             | Burrinjuck Dam            | 16             |             |
| Redfin perch    | 2010            | Murrumbidgee        | Upper             | Lake Ginninderra          | 120            | 3           |
| Redfin perch    | 2011            | Murrumbidgee        | Upper             | Yerrabi Pond              | 91             |             |
| Redfin perch    | 2011            | Murrumbidgee        | Upper             | Lake Ginninderra          | 36             |             |
| Australian bass | 2009            | Hunter <sup>2</sup> | Upper             | Glenbawn Dam              | 98             |             |
| River blackfish | 2008            | Murray              | Lower             | Mulwala Canal             | 108            |             |
| River blackfish | 2008            | Murrumbidgee        | Lower             | Tarcutta Creek            | 9              |             |
| Brown trout     | 2009            | Macquarie           | Upper             | Lake Oberon               | 7              |             |

| Species              | Collection Year | Compartment         | Zone <sup>1</sup> | Site Locations                                          | Number of Fish |             |
|----------------------|-----------------|---------------------|-------------------|---------------------------------------------------------|----------------|-------------|
|                      |                 |                     |                   |                                                         | Tested         | VI Positive |
| Brown trout          | 2009            | Snowy <sup>2</sup>  | Upper             | Swamp/Hughes Creek, Thredbo River (near Gaden Hatchery) | 34             |             |
| Common carp          | 2009            | Murray              | Lower             | Yarrawonga to Tocumwal                                  | 1              |             |
| Flat-headed gudgeon  | 2009            | Murray              | Lower             | Mulwala Canal                                           | 28             |             |
| Flat-headed gudgeon  | 2009            | Murrumbidgee        | Upper             | Blowering Dam                                           | 1              |             |
| Climbing galaxias    | 2008            | Murray              | Upper             | Geehi River                                             | 1              |             |
| Mountain galaxias    | 2008            | Murray              | Upper             | Geehi River                                             | 5              |             |
| Mountain galaxias    | 2008            | Murray              | Upper             | Upper Mannus Creek                                      | 31             |             |
| Mountain galaxias    | 2008            | Murrumbidgee        | Upper             | Pierces Creek, ACT                                      | 60             |             |
| Mountain galaxias    | 2009            | Macquarie           | Upper             | Winburndale Rivulet                                     | 48             |             |
| Eastern mosquitofish | 2008            | Murrumbidgee        | Upper             | Cotter River, ACT                                       | 419            |             |
| Eastern mosquitofish | 2011            | Murrumbidgee        | Upper             | Yerrabi Pond                                            | 1              |             |
| Golden perch         | 2008            | Murrumbidgee        | Upper             | Blowering Dam                                           | 20             |             |
| Golden perch         | 2008            | Murrumbidgee        | Upper             | Burrinjuck Dam                                          | 22             |             |
| Golden perch         | 2008            | Murrumbidgee        | Upper             | ACT                                                     | 7              |             |
| Golden perch         | 2009            | Murrumbidgee        | Upper             | Burrinjuck Dam                                          | 26             |             |
| Golden perch         | 2009            | Gwydir              | Upper             | Copeton Dam                                             | 80             |             |
| Golden perch         | 2009            | Murray              | Lower             | Yarrawonga to Tocumwal                                  | 3              |             |
| Golden perch         | 2009            | Unknown             |                   | Victoria                                                | 2              |             |
| Golden perch         | 2010            | Gwydir              | Upper             | Copeton Dam                                             | 8              |             |
| Macquarie perch      | 2009            | Nepean <sup>2</sup> | Upper             | Cataract Dam                                            | 27             |             |
| Mountain galaxias    | 2009            | Lachlan             | Upper             | Retreat River                                           | 27             |             |

| Species               | Collection Year | Compartment             | Zone <sup>1</sup> | Site Locations                                                                 | Number of Fish |             |
|-----------------------|-----------------|-------------------------|-------------------|--------------------------------------------------------------------------------|----------------|-------------|
|                       |                 |                         |                   |                                                                                | Tested         | VI Positive |
| Mountain galaxias     | 2009            | Lachlan                 | Upper             | Flyers Creek                                                                   | 37             |             |
| Murray cod            | 2007            | Murrumbidgee            | Upper             | Burrinjuck Dam                                                                 | 10             |             |
| Murray cod            | 2007            | Murrumbidgee            | Lower             | Buckingbong                                                                    | 3              |             |
| Murray cod            | 2008            | Murray                  | Lower             | Mulwala Canal                                                                  | 11             |             |
| Murray cod            | 2008            | Murrumbidgee            | Upper             | Blowering Dam                                                                  | 31             |             |
| Murray cod            | 2008            | Murrumbidgee            | Upper             | Burrinjuck Dam                                                                 | 13             |             |
| Murray cod            | 2009            | Murrumbidgee            | Upper             | Burrinjuck Dam                                                                 | 30             |             |
| Murray cod            | 2009            | Murray                  | Lower             | Yarrawonga to Tocumwal, Lake Mulwala to Ovens River, Lake Hume to Lake Mulwala | 29             |             |
| Murray cod            | 2009            | Murrumbidgee            | Lower             | Biagee                                                                         | 1              |             |
| Murray cod            | 2009            | Namoi                   | Lower             | East Yarral, Miloo                                                             | 3              |             |
| Murray cod            | Unknown         | Lachlan                 |                   |                                                                                | 1              |             |
| Murray cod            | Unknown         | Unknown                 |                   |                                                                                | 12             |             |
| Murray cod            | 2009            | Gwydir                  | Upper             | Copeton Dam                                                                    | 16             |             |
| Murray cod            | 2010            | Murray                  | Lower             | Yarrawonga                                                                     | 7              |             |
| Murray cod            | 2010            | Murrumbidgee            | Lower             | Narranderra                                                                    | 13             |             |
| Oriental weatherloach | 2009            | Hawkesbury <sup>2</sup> | Lower             | Little River                                                                   | 7              |             |
| Southern pygmy perch  | 2009            | Murray                  | Upper             | Coppabella Creek                                                               | 229            |             |
| Rainbow trout         | 2008            | Murrumbidgee            | Upper             | Cotter River and Condor Creek, ACT                                             | 115            |             |
| Rainbow trout         | 2009            | Lachlan                 | Upper             | Retreat River, Boree Creek                                                     | 5              |             |
| Rainbow trout         | 2009            | Macquarie               | Upper             | Lake Oberon, Turon River, Campbells River, Duckmaloi River                     | 22             |             |

| Species       | Collection Year | Compartment        | Zone <sup>1</sup> | Site Locations         | Number of Fish |             |
|---------------|-----------------|--------------------|-------------------|------------------------|----------------|-------------|
|               |                 |                    |                   |                        | Tested         | VI Positive |
| Rainbow trout | 2009            | Snowy <sup>2</sup> | Upper             | Gang Gang Creek        | 31             |             |
| Rainbow trout | 2009            | Namoi              | Upper             | McDonald River         | 4              |             |
| Roach         | 2009            | Yarra <sup>2</sup> |                   | Wonga Park             | 1              |             |
| Silver perch  | 2007            | Murrumbidgee       | Upper             | Burrinjuck Dam         | 4              |             |
| Silver perch  | 2009            | Gwydir             | Upper             | Copeton Dam            | 4              |             |
| Silver perch  | 2009            | Murray             | Lower             | Yarrawonga to Tocumwal | 7              |             |
| Silver perch  | 2009            | Gwydir             | Upper             | Copeton Dam            | 51             |             |
| Silver perch  | 2010            | Gwydir             | Upper             | Copeton Dam            | 4              |             |
| Trout cod     | 2009            | Murray             | Lower             | Yarrawonga to Tocumwal | 20             |             |
| Trout cod     | 2008            | Murrumbidgee       | Lower             | Buckingboing boat ramp | 1              |             |
| <b>TOTAL</b>  |                 |                    |                   |                        | <b>3622</b>    | <b>12</b>   |

<sup>1</sup>Upper (>400 m) and lower (<400 m) zones were designated based on altitude from Lintermans (2007); <sup>2</sup>not in Murray-Darling Basin.

**Supplementary Table S2.** Summary of serum samples collected from redfin perch and other species between 2007 and 2011, based on year and catchment area.

| Species         | Collection Year | Compartment        | Zone <sup>1</sup> | Site Location                                                                           | Number |
|-----------------|-----------------|--------------------|-------------------|-----------------------------------------------------------------------------------------|--------|
| Redfin perch    | 2008            | Murray             | Lower             | Mulwala Canal                                                                           | 42     |
| Redfin perch    | 2008            | Lachlan            | Upper             | Reidsdale, Little Narraway                                                              | 5      |
| Redfin perch    | 2010            | Murrumbidgee       | Upper             | Lake Ginninderra                                                                        | 8      |
| Redfin perch    | 2011            | Murrumbidgee       | Upper             | Lake Ginninderra*                                                                       | 14     |
| Redfin perch    | 2011            | Murrumbidgee       | Upper             | Yerrabi Pond                                                                            | 21     |
| Golden perch    | 2008            | Murrumbidgee       | Upper             | ACT                                                                                     | 4      |
| Golden perch    | 2010            | Murrumbidgee       | Upper             | Lake Ginninderra                                                                        | 3      |
| Golden perch    | 2011            | Murrumbidgee       | Upper             | Lake Ginninderra                                                                        | 2      |
| Golden perch    | 2011            | Murrumbidgee       | Upper             | Yerrabi Pond                                                                            | 1      |
| Macquarie perch | 2008            | Lachlan            | Upper             | Abercrombie River, Lachlan River                                                        | 29     |
| Macquarie perch | 2009            | Yarra <sup>2</sup> |                   | Wonga Park, Jumping Creek                                                               | 48     |
| Murray cod      | 2007            | Lachlan            | Lower             | Euabalong                                                                               | 40     |
| Murray cod      | 2008            | Murray             | Lower             | Colligen Creek., Edwards River, Murray River, Wakool River, Niemur River, Mulwala Canal | 102    |
| Murray cod      | 2008            | Murray             | Upper             | Clarkes Reserve                                                                         | 3      |
| Murray cod      | 2008            | Darling            | Lower             | Minda, Menin Court, Cuthero Point, Whurlie                                              | 17     |
| Murray cod      | 2008            | Murrumbidgee       | Lower             | Hay boat ramp, Markey's Beach, Buckingbong                                              | 7      |
| Murray cod      | 2008            | Lachlan            | Lower             | Booligal Weir                                                                           | 4      |
| Murray cod      | 2008            | Macquarie          | Lower             | Dubbo boat ramp, Fred Firth boat ramp                                                   | 4      |
| Murray cod      | 2009            | Namoi              | Lower             |                                                                                         | 7      |
| Murray cod      | 2009            | Namoi              | Upper             |                                                                                         | 5      |
| Murray cod      | 2011            | Murrumbidgee       | Upper             | Lake Ginninderra                                                                        | 10     |

|              |      |              |       |                                                                         |            |
|--------------|------|--------------|-------|-------------------------------------------------------------------------|------------|
| Murray cod   | 2011 | Murrumbidgee | Upper | Yerrabi Pond                                                            | 10         |
| Silver perch | 2007 | Murrumbidgee | Lower | NFC (Buckinbong)                                                        | 32         |
| Silver perch | 2008 | Murray       | Lower | Colligen Creek, Edwards River, Murray River, Wakool River, Niemur River | 23         |
| Trout cod    | 2008 | Murrumbidgee | Upper | ACT                                                                     | 4          |
| <b>TOTAL</b> |      |              |       |                                                                         | <b>445</b> |

<sup>1</sup>Upper (>400 m) and lower (<400 m) zones were designated based on altitude from Lintermans (2007); \* two samples were positive for antibodies specific for

EHNv; <sup>2</sup>not in Murray-Darling Basin.

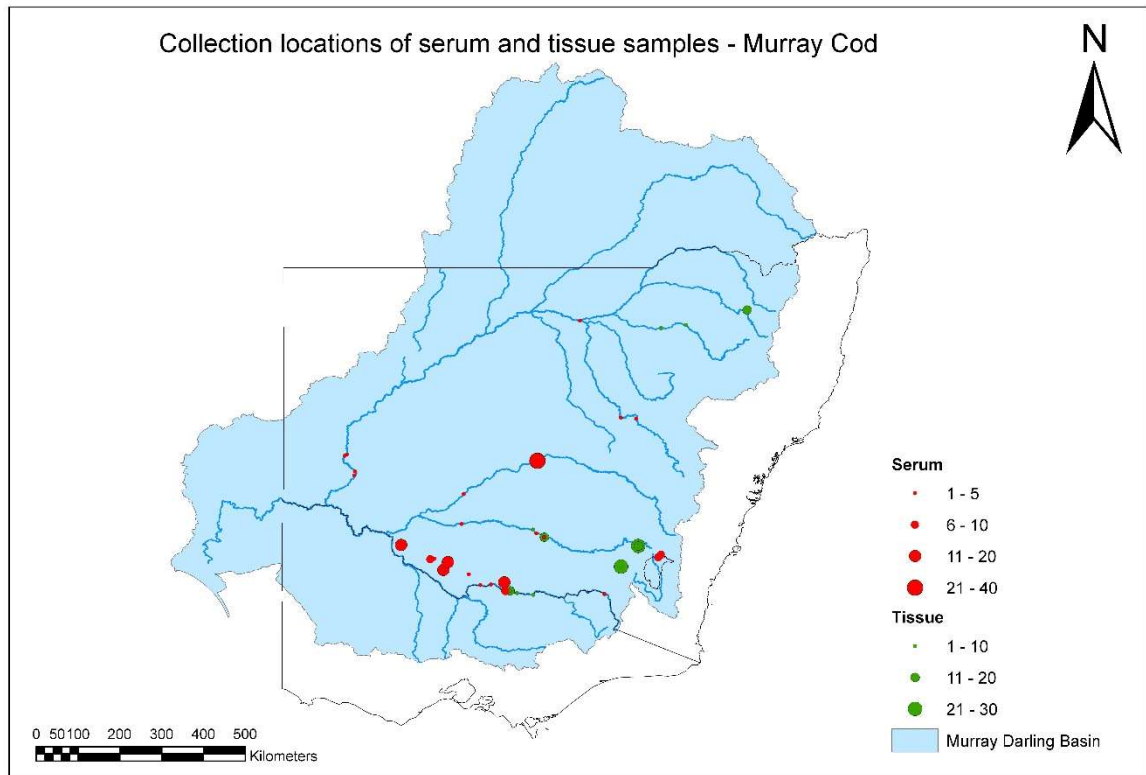

**Supplementary Figure S1.** Distribution and number of tissue and serum samples collected from Murray cod between July 2007 and June 2011.



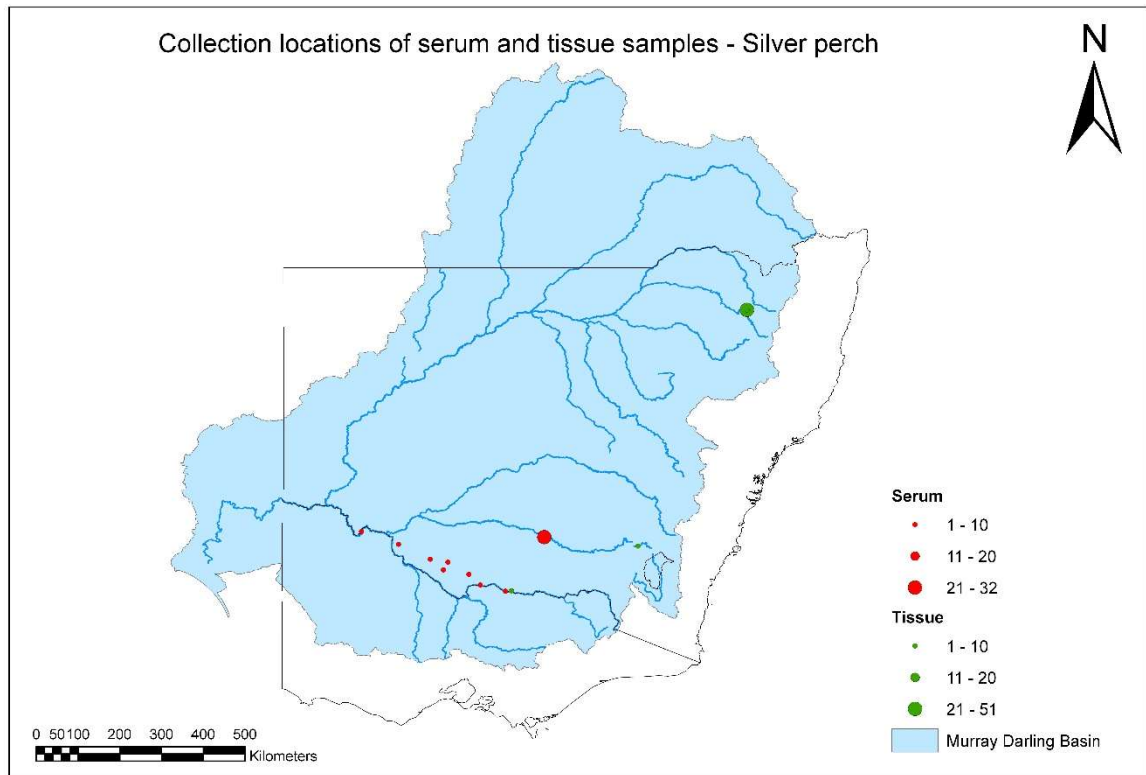

**Supplementary Figure S2.** Distribution and number of tissue and serum samples collected from silver perch between July 2007 and June 2011.

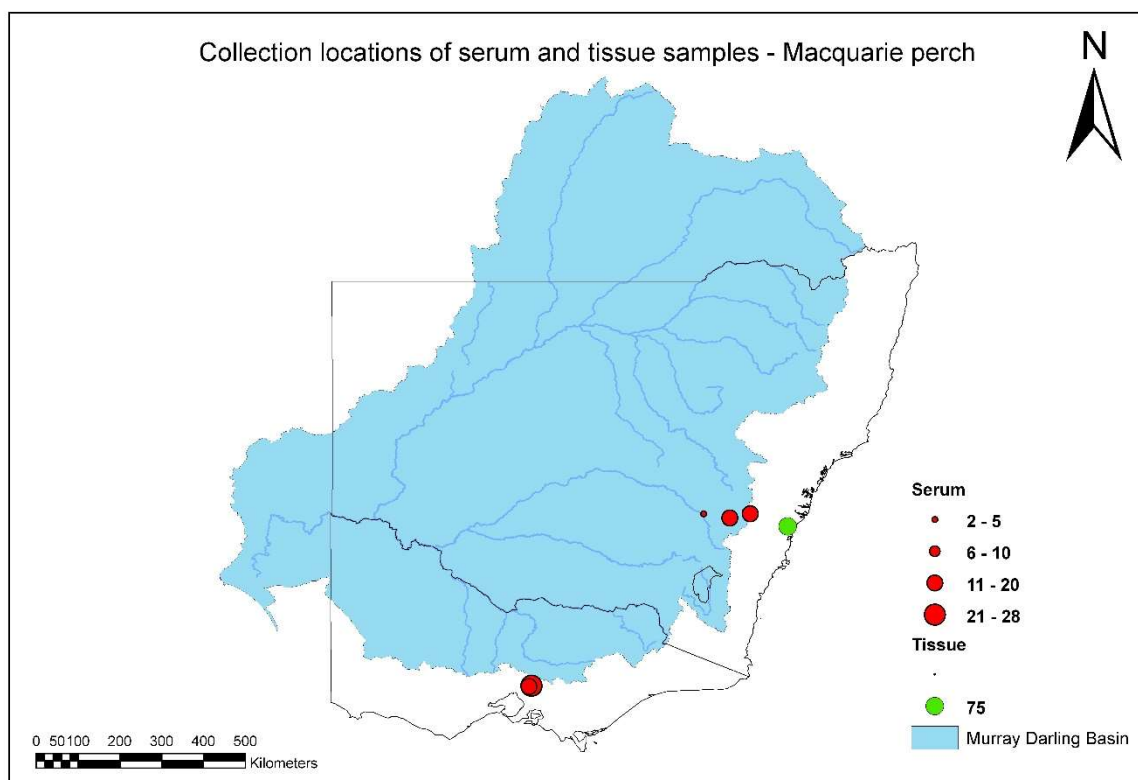

**Supplementary Figure S3.** Distribution and number of tissue and serum samples collected from Macquarie perch between July 2007 and June 2011.

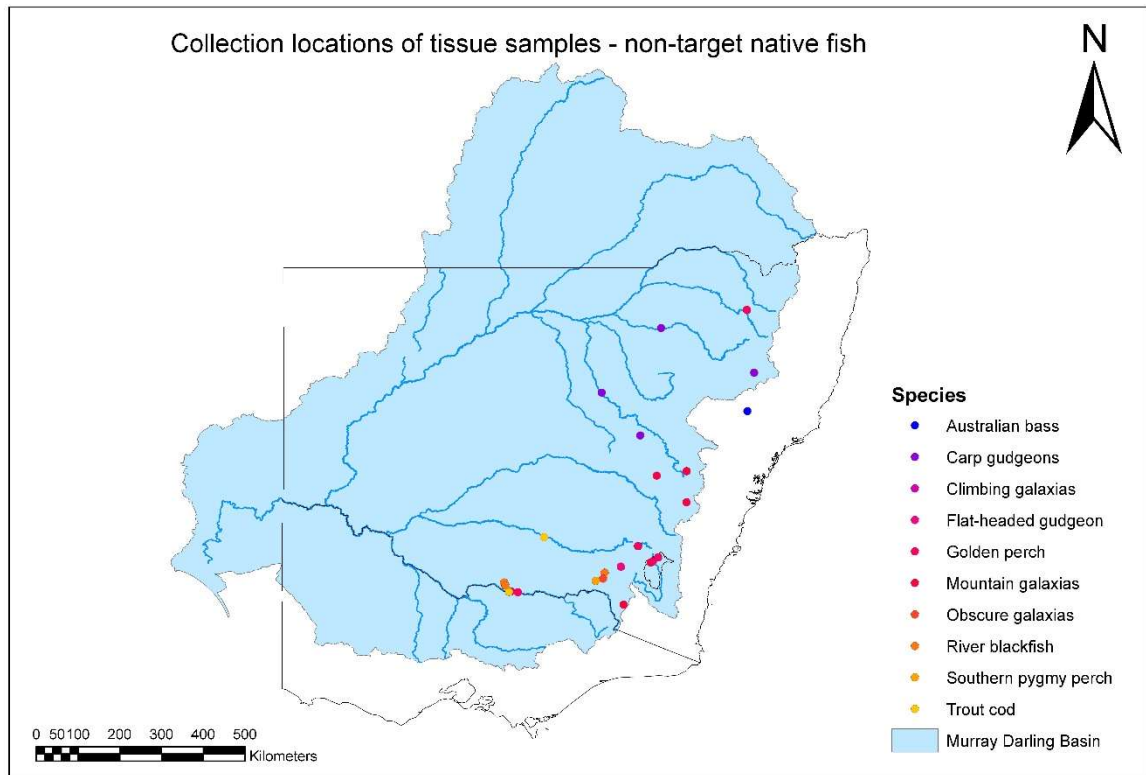

**Supplementary Figure S4.** Distribution of tissue and serum samples collected from various native fish species between July 2007 and June 2011.

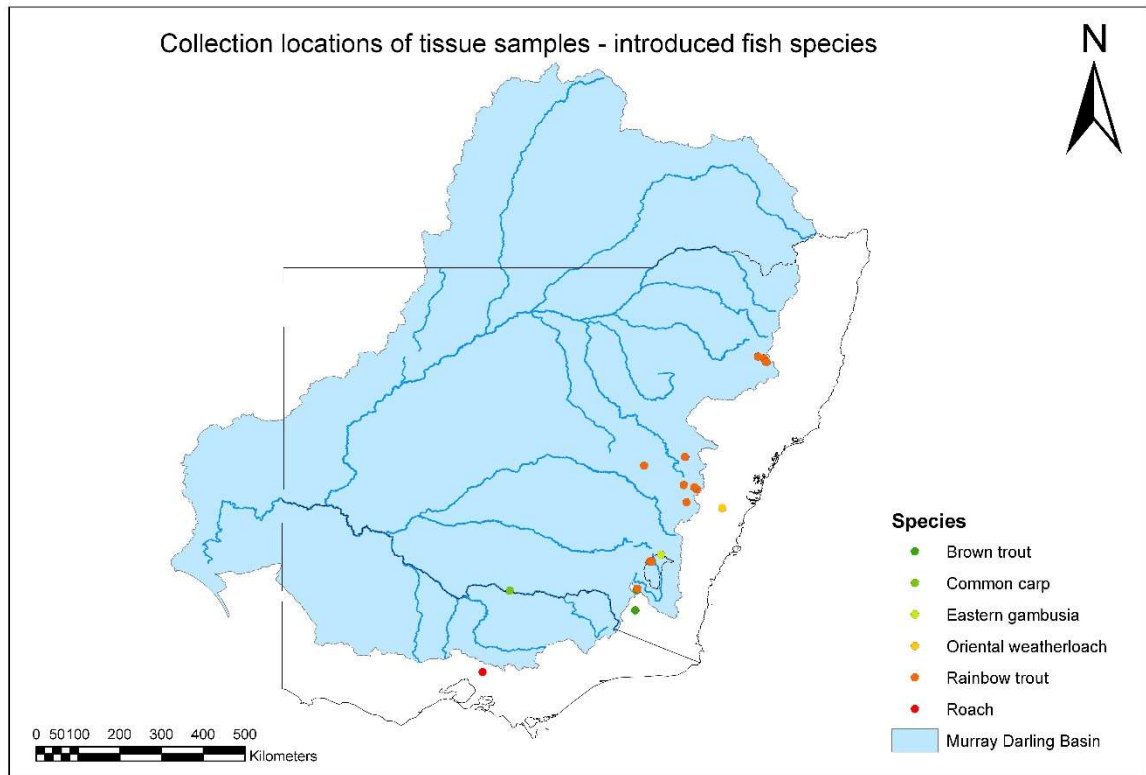

**Supplementary Figure S5.** Distribution of tissue and serum samples collected from alien fish species between July 2007 and June 2011.

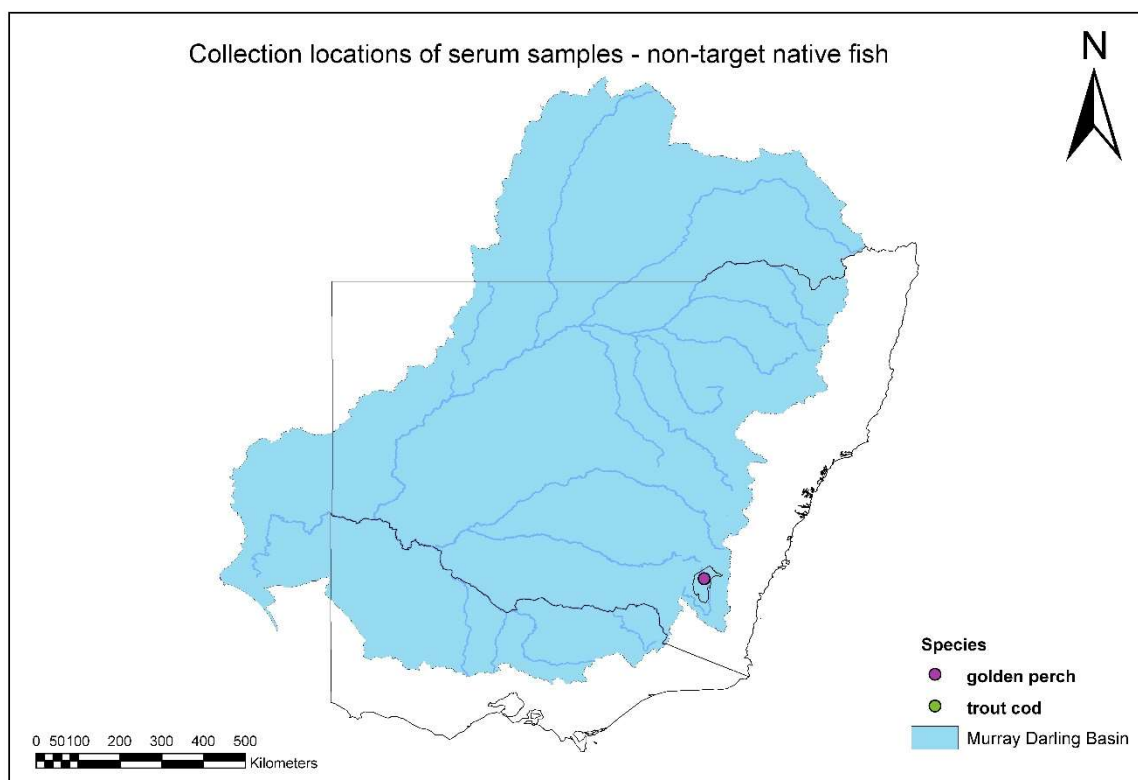

**Supplementary Figure S6.** Distribution of tissue and serum samples collected from other native fish species between July 2007 and June 2011. The locations for golden perch and trout cod were coincidental.
